# Supplementary material
Source: JCI journal article supplement (doi:10.1172/jci191058)

Figure 2

L = Protein ladder

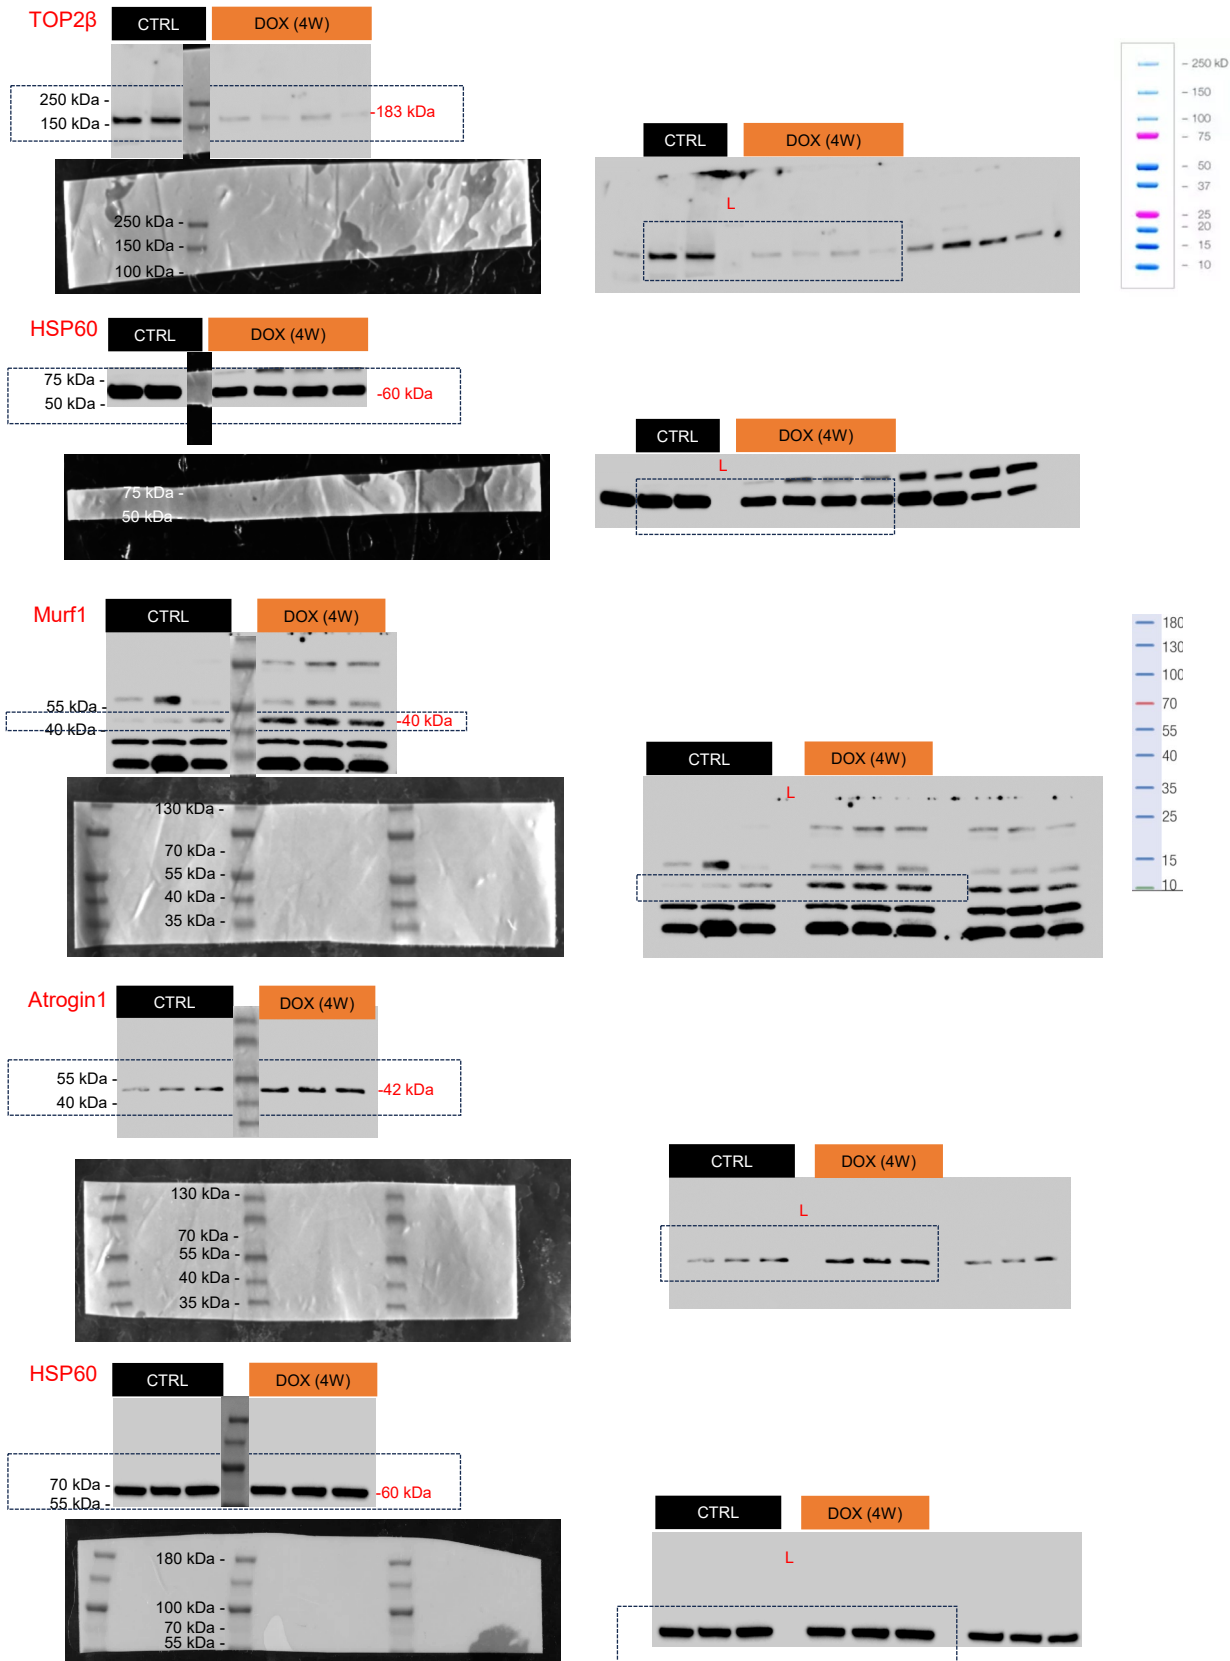

Figure 4

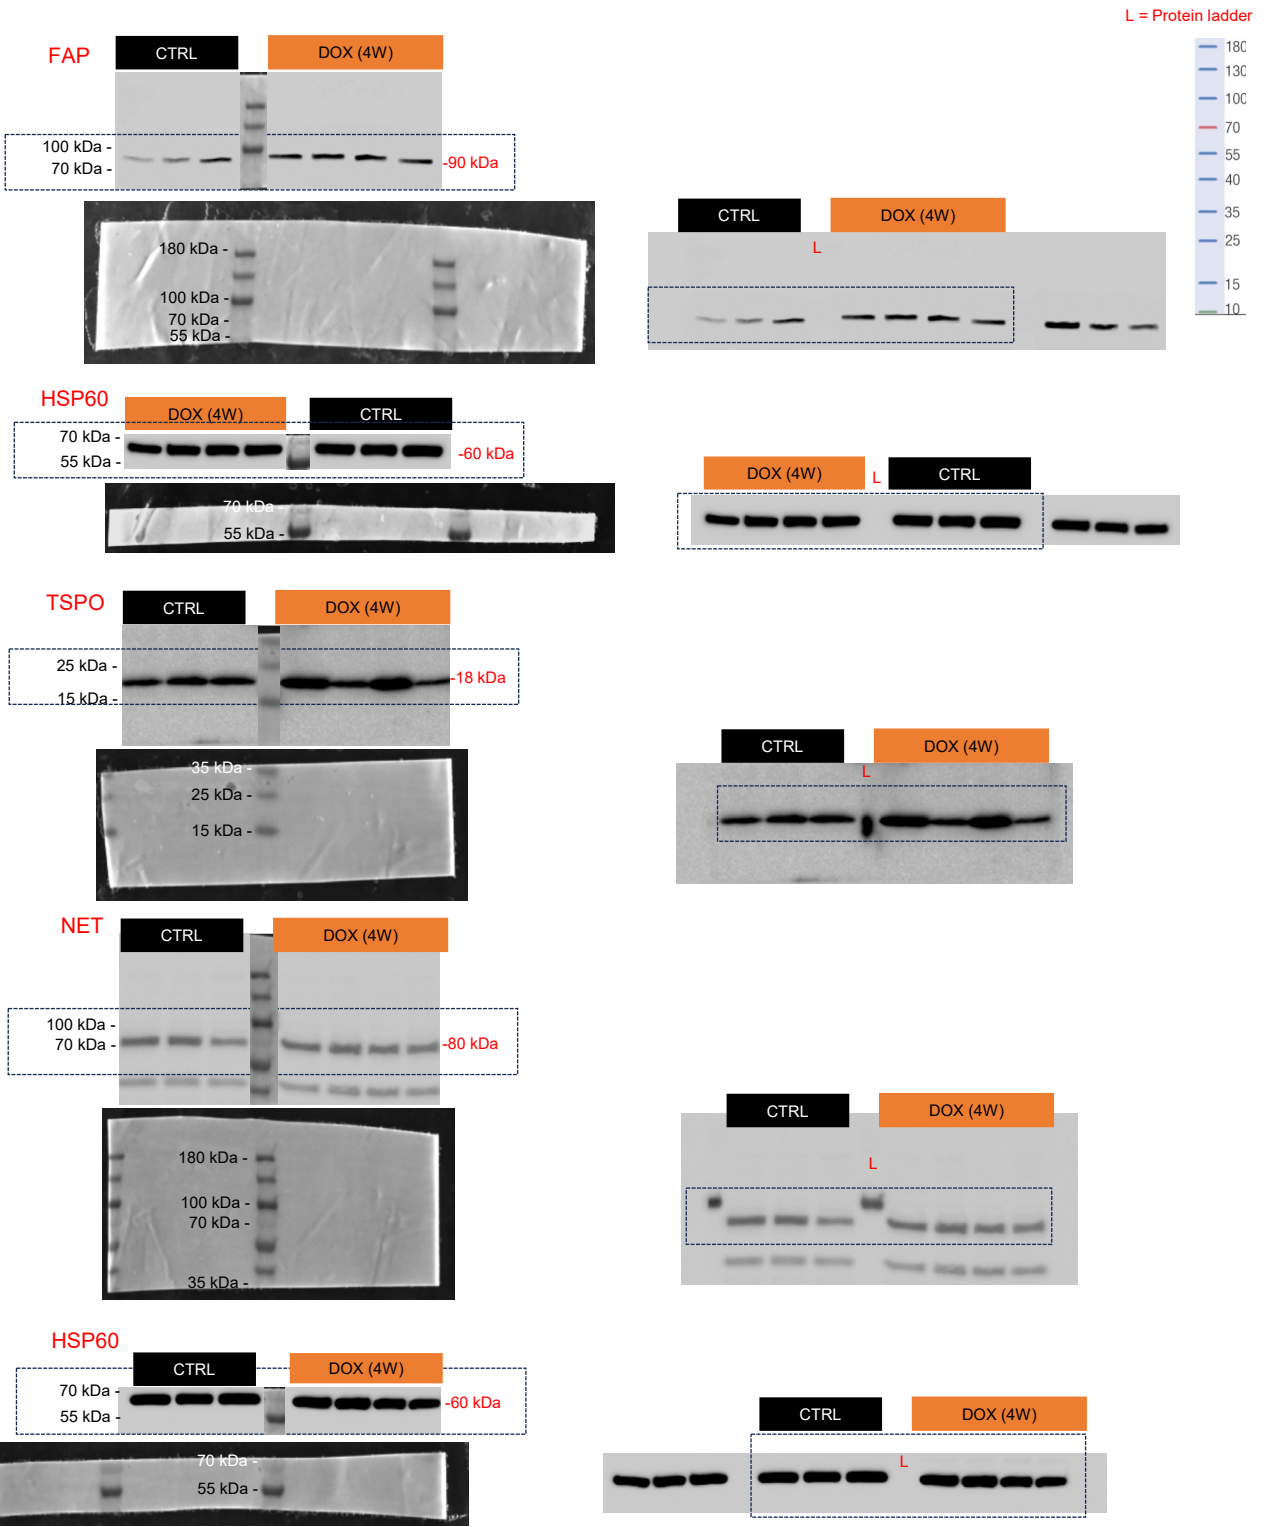

Figure 5

L = Protein ladder

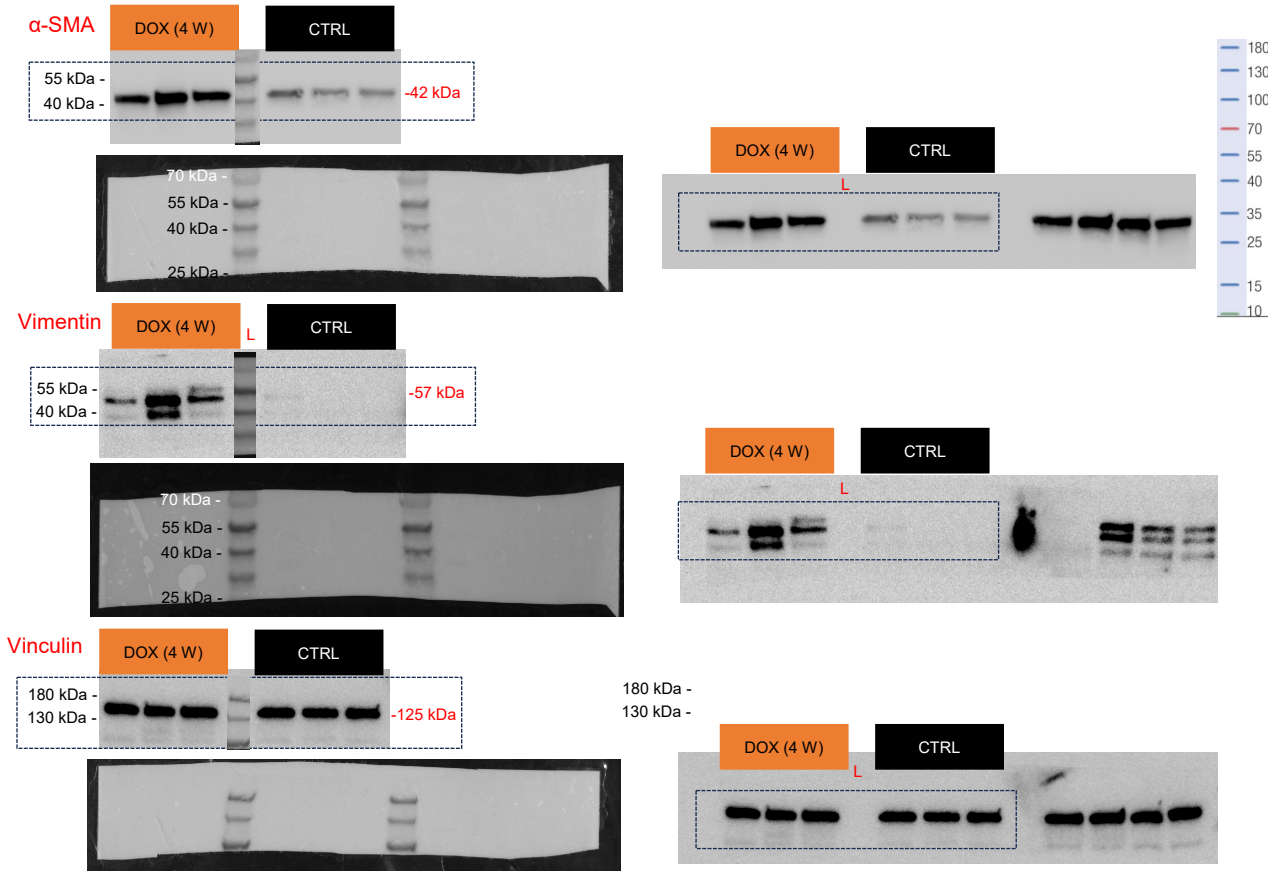

Figure 6

L = Protein ladder

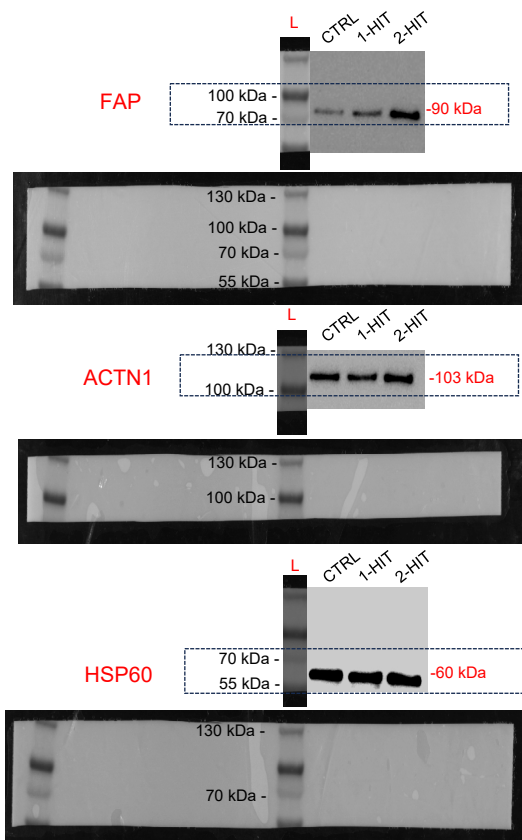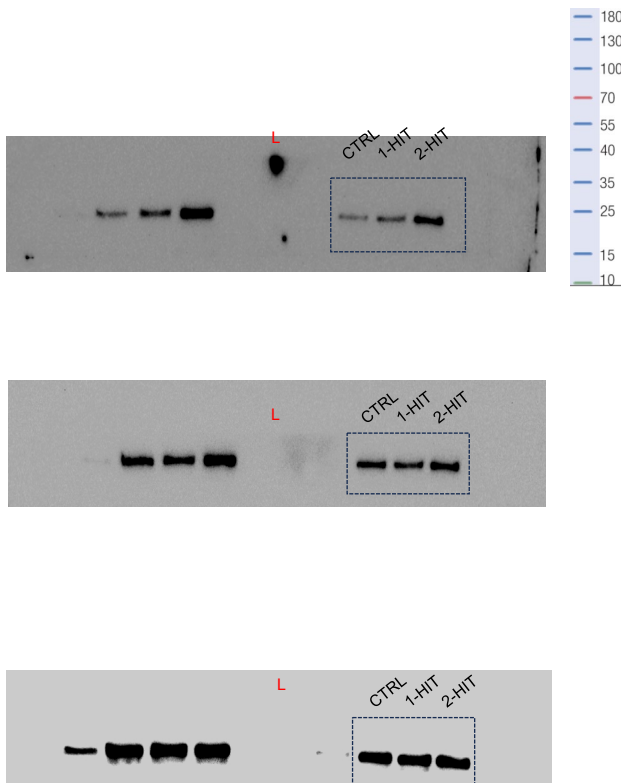

Figure 7

L = Protein ladder

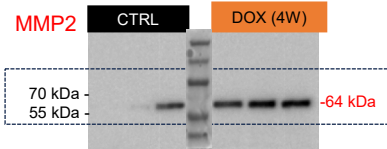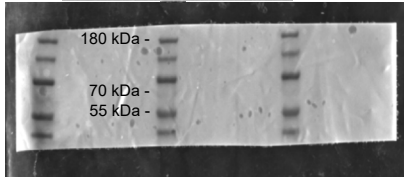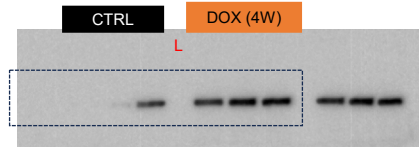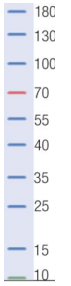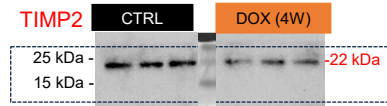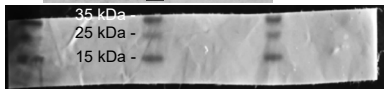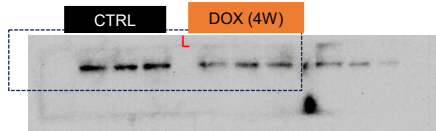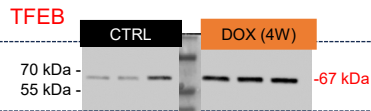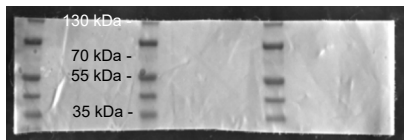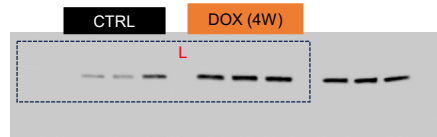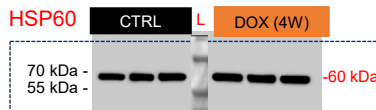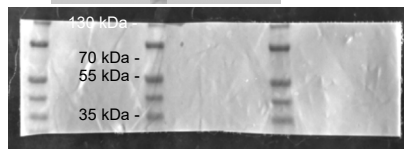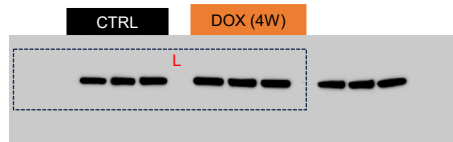

Figure 8

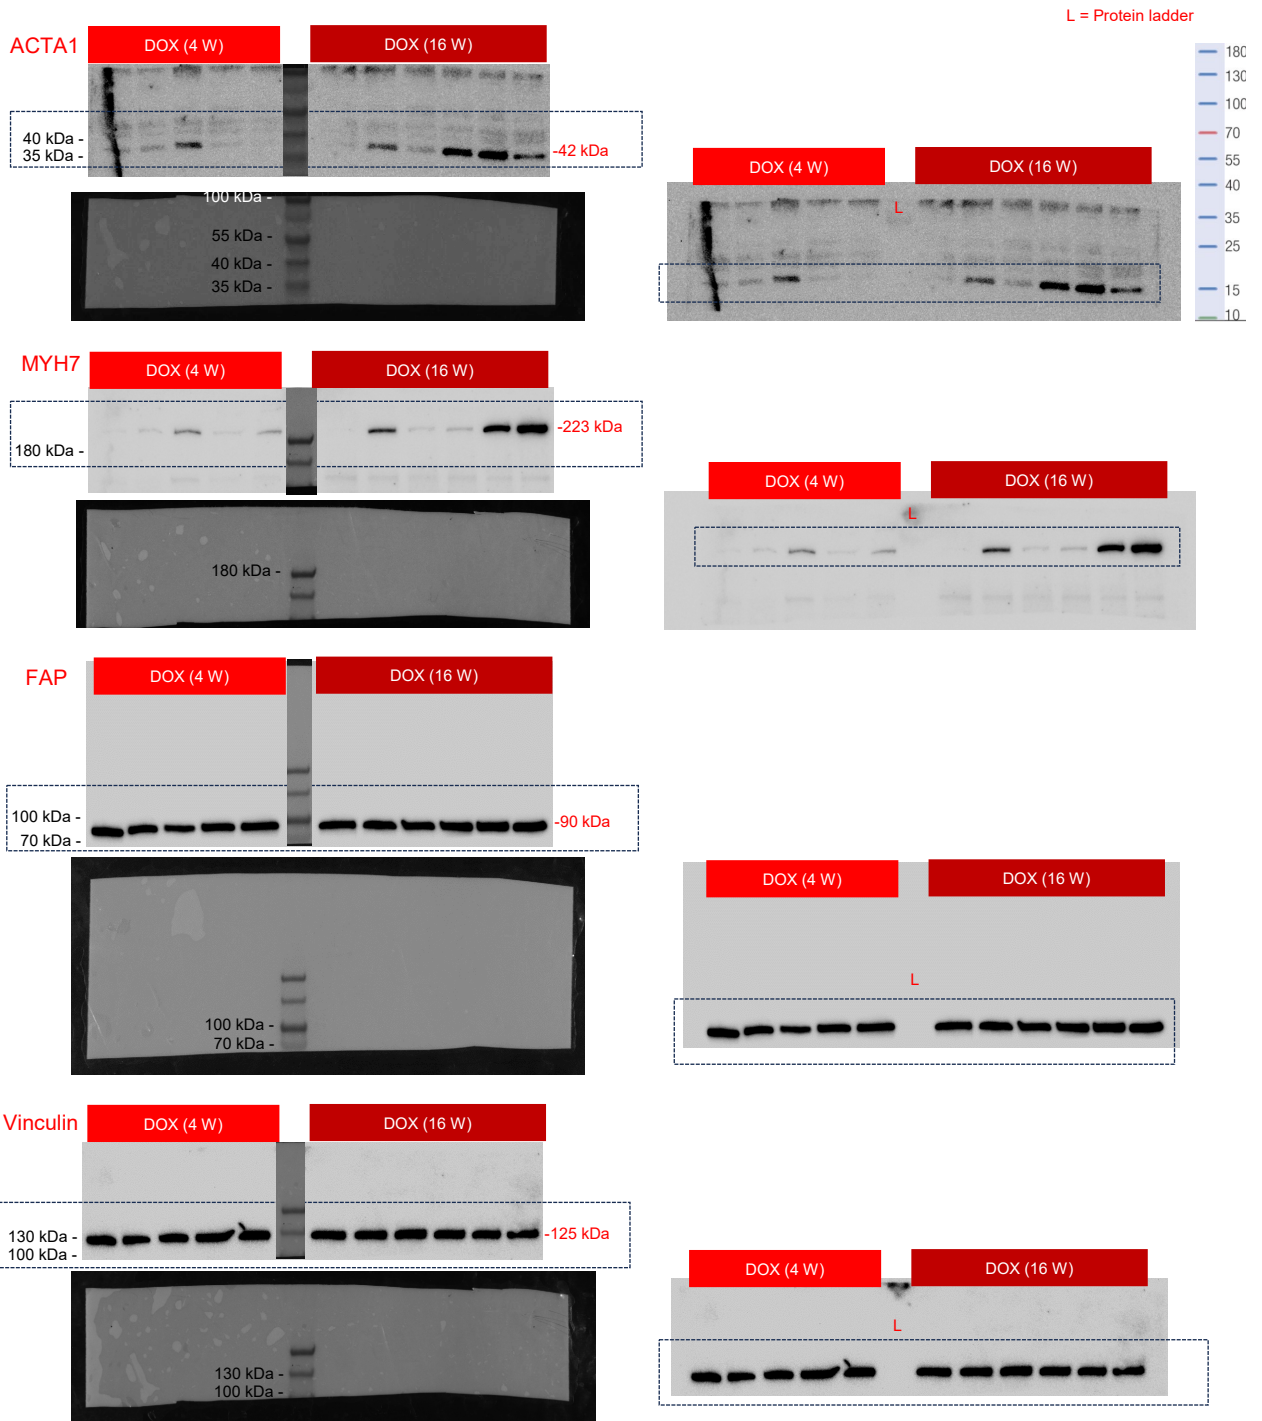

Supplementary Figure 2

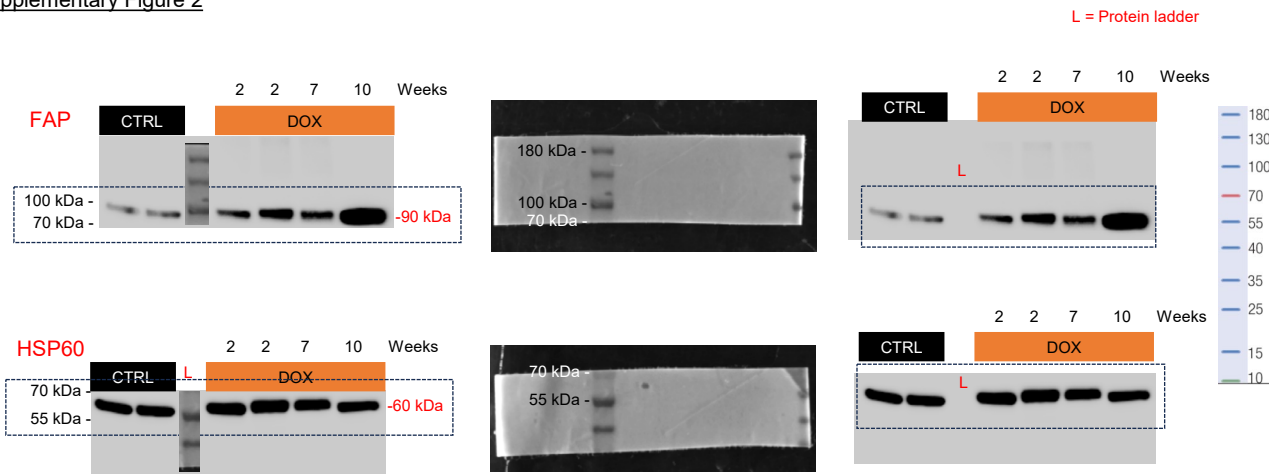

Supplement: sd2 [file 2]
